# Supplementary material for: General synthesis of xLi2MnO3·(1 − x)LiNi1/3Co1/3Mn1/3O2 (x = 1/4, 1/3, and 1/2) hollow microspheres towards enhancing the performance of rechargeable lithium ion batteries
Source: Royal Society of Chemistry journal article supplement (doi:10.1039/c6ta04219h), 2016-01-01
Supplement: c6ta04219h1.pdf [file c6ta04219h1.pdf]

*Electronic Supplementary Information*

**General Synthesis of  $x\text{Li}_2\text{MnO}_3 \cdot (1-x) \text{LiNi}_{1/3}\text{Co}_{1/3}\text{Mn}_{1/3}\text{O}_2$  ( $x = 1/4, 1/3$ , and  $1/2$ ) Hollow Microspheres towards Enhancing Performance in Rechargeable Lithium Ion Batteries**

Jingfa Li,<sup>a,\*</sup> Min Li,<sup>b,\*</sup> Lei Zhang,<sup>a</sup> Jiazhao Wang<sup>c</sup>

<sup>a</sup> Department of Applied Physics, School of Physics and Optoelectronic Engineering, Nanjing University of Information Science and Technology, Nanjing, Jiangsu, 210044, China

<sup>b</sup> School of Physics and Electronic Engineering, Taishan University, Taian, Shandong, 271021, P. R. China

<sup>c</sup> Institute for Superconducting and Electronic Materials, University of Wollongong, Wollongong, NSW 2522, Australia

---

\*corresponding author: E-mail: [aplijf@nuist.edu.cn](mailto:aplijf@nuist.edu.cn) (J. F. L); [liminbuaa@126.com](mailto:liminbuaa@126.com) (M. L)

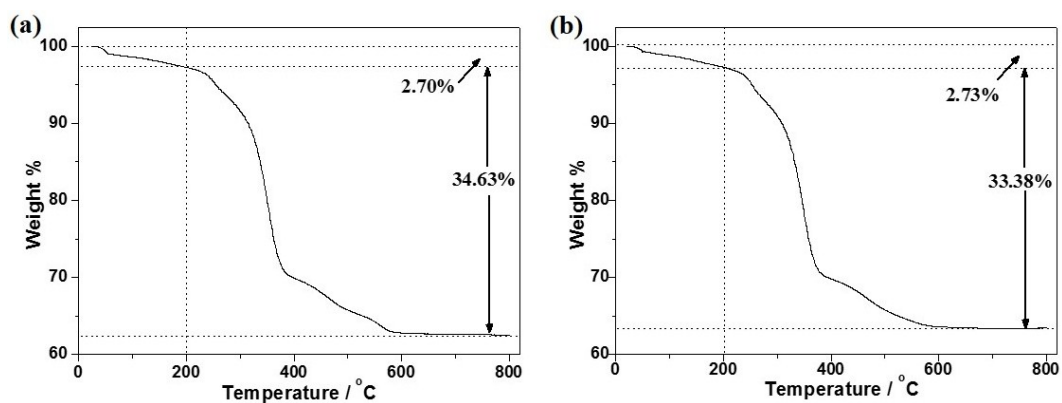

**Figure S1.** TGA curves for  $\text{Co}_y\text{Mn}_{3-y}(\text{CO}_3)_3$  precursors with (a)  $y = 6/7$  and (b)  $y = 3/5$ .

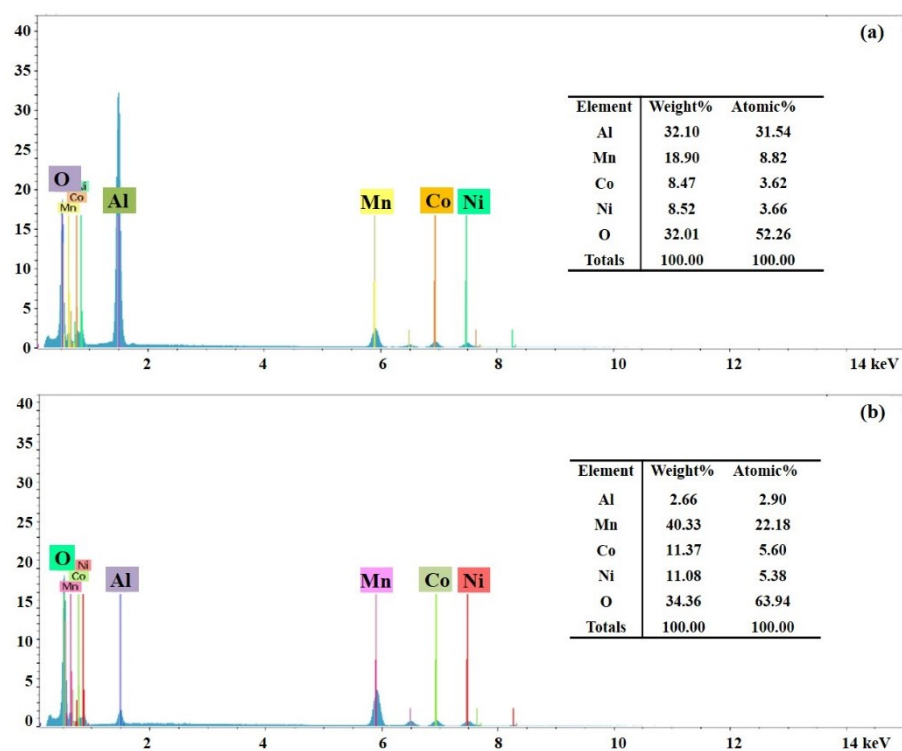

**Figure S2.** EDX spectra and corresponding elemental analysis of LNCM-2 (a) and LNCM-3 (b). The Al signal originates from the SEM aluminum substrate used in the measurements.

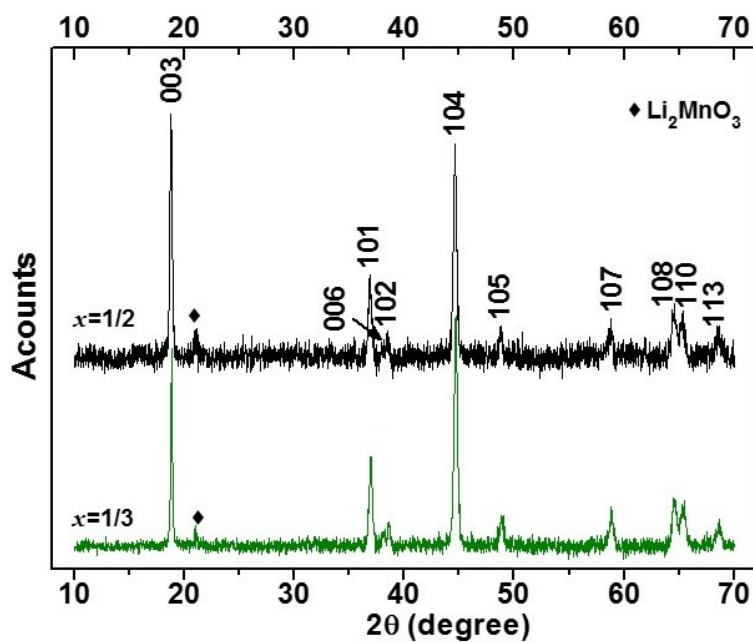

**Figure S3.** XRD patterns of the LNCM-2 (bottom) and LNCM-3 (top) hollow microspheres.

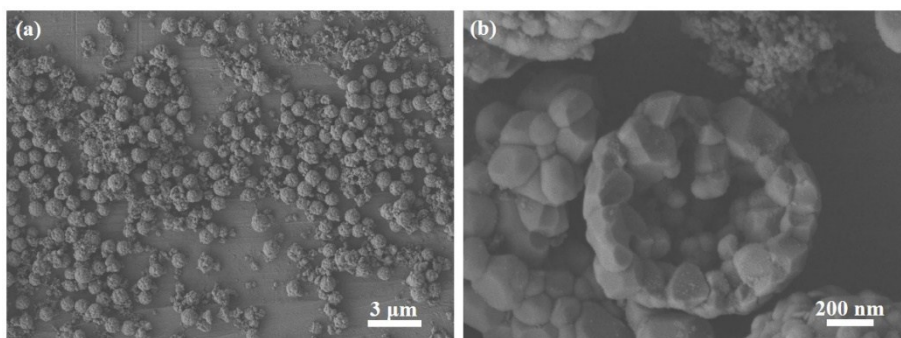

**Figure S4.** (a) Low and (b) high-magnification FESEM images of the electrode made of  $x\text{Li}_2\text{MnO}_3 \cdot (1-x)\text{LiNi}_{1/3}\text{Co}_{1/3}\text{Mn}_{1/3}\text{O}_2$  hollow microspheres with  $x = 1/3$  after 200 cycles at the 1.0 C rate.
